# Supplementary material
Source: PubMed Central journal article supplement (PMC3174377)

## Supplemental Data

### Figure S1. Diagrammatical description of the experiment groups and the protocol.

(A) Experimental design in vivo: sham group (n = 21): a ligature was placed under the LAD (arrow) but was not tightened, and a time course similar to other groups was followed; I/R group (n = 21): occlusion of LAD for 45 min (I: ischemia indicated by the dark bar), was followed by reperfusion (R: reperfusion indicated by the white bar); IPoC group (n = 21): occlusion of LAD for 45 min, followed by 3 cycles of 30 s of R and 30 s of I before the reperfusion. In all rats, reperfusion by loosening the ligature for different time courses (1, 3, 6, 9, 12, 15 and 24h).

(B) Experiment design in vitro: sham group: cell culture in normoxic conditions (arrow), and a time course similar to other groups was followed; H/Re group: cells subjected to 6 h of hypoxia (H: hypoxia indicated by the dark bar) followed by reoxygenation (Re: reoxygenation indicated by the white bar); HPoC group: cells subjected to 6 h of hypoxia followed by 3 cycles of 10 min of Re and 10 min H before the reoxygenation. In all groups, reoxygenation for different time courses (1, 3, 6, 9, 12, 15 and 24 h).

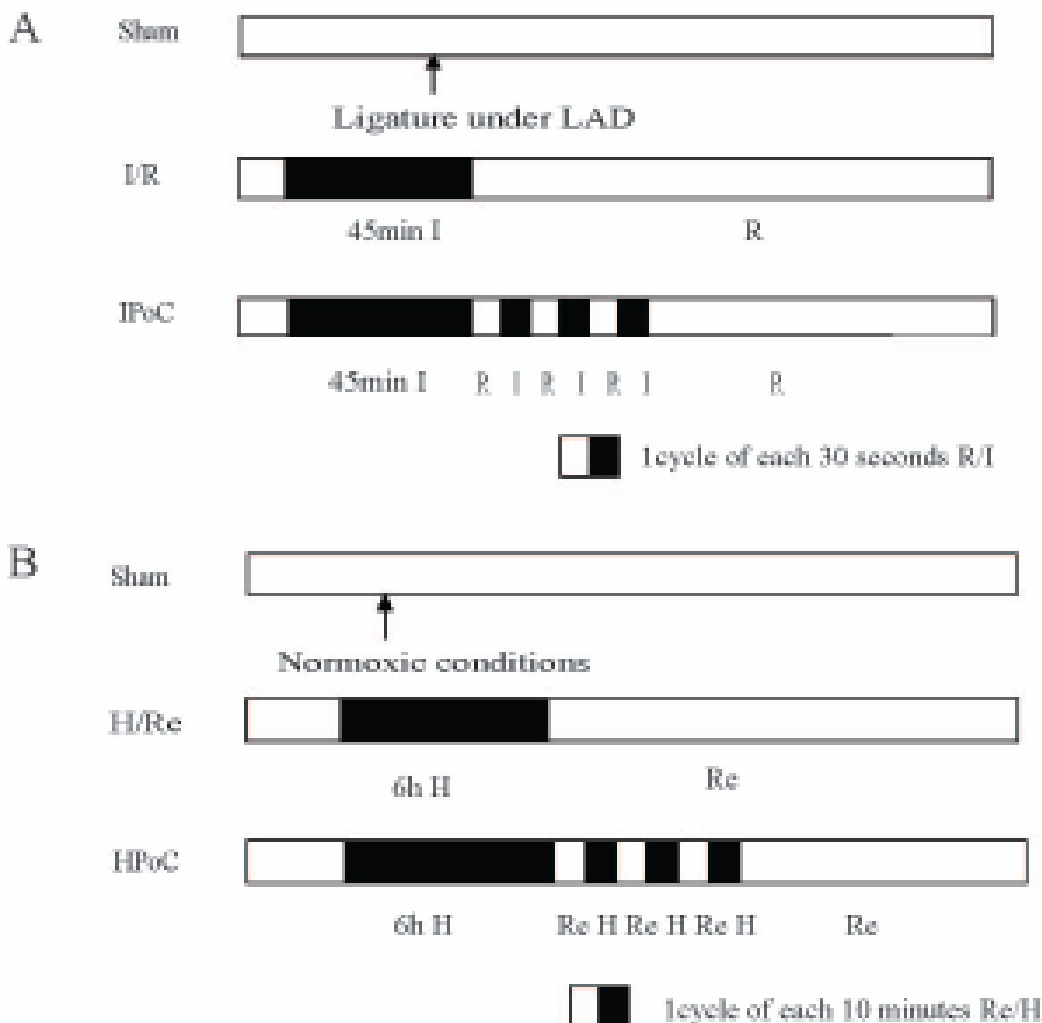

Supplement: emm-43-437-s001.pdf [file emm-43-437-s001.pdf]
